# Supplementary material
Source: publisher site journal article supplement (https://www.dovepress.com/article/573807)
Supplement: Supplementary file 1 [file 573807%20Supplementary%20Tables.docx]

Supplementary Table 1. Comparison of Microbiota Diversity in Sputum Samples Among the Four Study Groups

|  | **HP**  **(n=20)** | **HR**  **(n=20)** | **PLD-COPD**  **(n=16)** | **PVD-COPD**  **(n=16)** | **P value** |
| --- | --- | --- | --- | --- | --- |
| Shannon | 6.61±0.58 | 6.26±0.82 | 5.89±0.73 | 6.28±0.75 | **0.029** |
| Simpson | 0.96±0.02 | 0.94±0.04 | 0.95±0.03 | 0.95±0.03 | 0.166 |
| Ace | 505.02±78.61 | 540.68±94.34 | 402.60±99.40 | 539.19±120.93 | **＜0.001** |
| Chao1 | 504.15±78.26 | 539.48±94.33 | 401.83±99.07 | 537.29±120.77 | **＜0.001** |

Notes: HP: Healthy control group; HR: High-risk population; PLD-COPD: Newly diagnosed COPD; PVD-COPD: Previously diagnosed COPD. **Bold p-values indicate statistically significant differences among the four groups (p < 0.05)**.

Supplementary Table 2. Comparison of Microbiota Diversity in Saliva Samples Among the Four Study Groups

|  | **HP**  **(n=20)** | **HR**  **(n=20)** | **PLD-COPD**  **(n=16)** | **PVD-COPD**  **(n=16)** | **P value** |
| --- | --- | --- | --- | --- | --- |
| Shannon | 6.29±0.64 | 5.78±0.91 | 5.70±1.11 | 5.80±1.00 | 0.117 |
| Simpson | 0.95±0.03 | 0.92±0.06 | 0.92±0.13 | 0.93±0.07 | 0.326 |
| Ace | 461.15±60.83 | 374.79±122.20 | 356.71±96.00 | 371.15±117.86 | **0.01** |
| Chao1 | 460.41±61.21 | 374.29±122.13 | 356.35±96.67 | 370.91±117.57 | **0.012** |

Notes: HP: Healthy control group; HR: High-risk population; PLD-COPD: Newly diagnosed COPD; PVD-COPD: Previously diagnosed COPD. **Bold p-values indicate statistically significant differences among the four groups (p < 0.05)**.

Supplementary Table 3. Analysis of Dominant Genera Among the Four Groups

| **Dominant Genus** | **HP(%)** | **Dominant Genus** | **HR(%)** | **Dominant Genus** | **PLD-COPD(%)** | **Dominant Genus** | **PVD-COPD(%)** |
| --- | --- | --- | --- | --- | --- | --- | --- |
| Neisseria | 19.32 | Neisseria | 21.03 | Streptococcus | 17.68 | Streptococcus | 15.84 |
| Prevotella | 13.41 | Streptococcus | 14.91 | Neisseria | 14.86 | Neisseria | 15.27 |
| Streptococcus | 7.28 | Rothia | 7.80 | Rothia | 10.37 | Rothia | 9.93 |
| Fusobacterium | 6.51 | Prevotella | 4.85 | Veillonella | 7.50 | Prevotella | 6.86 |
| Porphyromonas | 6.22 | Haemophilus | 4.80 | Actinomyces | 6.60 | Veillonella | 5.42 |
| Rothia | 5.04 | Fusobacterium | 4.50 | Haemophilus | 5.92 | Actinomyces | 4.58 |
| Leptotrichia | 4.55 | Veillonella | 4.45 | Prevotella | 5.54 | Pseudomonas | 4.14 |
| Haemophilus | 4.27 | Actinomyces | 4.28 | Fusobacterium | 3.73 | Haemophilus | 3.43 |
| Veillonella | 3.42 | Leptotrichia | 3.60 | Porphyromonas | 2.76 | Fusobacterium | 3.43 |
| Actinomyces | 2.94 | Porphyromonas | 2.30 | Leptotrichia | 2.49 | Leptotrichia | 3.26 |
| Alloprevotella | 2.32 | Gemella | 1.25 | Campylobacter | 1.31 | Gemella | 2.45 |
| Campylobacter | 1.72 | Capnocytophaga | 1.25 | Gemella | 1.24 | Porphyromonas | 2.04 |
| Lautropia | 1.58 | Lautropia | 1.21 | Alloprevotella | 0.99 | Capnocytophaga | 1.15 |
| Selenomonas | 1.44 | Selenomonas | 1.21 | Corynebacterium | 0.97 | Campylobacter | 1.04 |
| Treponema | 1.39 | Treponema | 1.15 | Selenomonas | 0.70 | Treponema | 0.96 |

Notes: HP: Healthy control group; HR: High-risk population; PLD-COPD: Newly diagnosed COPD; PVD-COPD: Previously diagnosed COPD.

Supplementary Table 4. Comparison of α-diversity Among Different Genus Groups

|  | **Neisseria-dominant group（n=15）** | **Streptococcus-dominant group（n=11）** | **Other genera-dominant group（n=6）** | **P value** |
| --- | --- | --- | --- | --- |
| Shannon | 6.11±0.73 | 6.29±0.57 | 5.66±1.03 | 0.458 |
| Simpson | 0.95±0.02 | 0.96±0.02 | 0.94±0.04 | 0.606 |
| Ace | 483.33±139.43 | 493.58±111.12 | 392.89±125.32 | 0.278 |
| Chao1 | 484.53±140.08 | 494.84±111.49 | 392.16±125.64 | 0.278 |

****Notes:**** Neisseria-dominant group, Streptococcus-dominant group, and Other genera-dominant group refer to subgroups classified by the most abundant genus identified in sputum samples. All p-values > 0.05, indicating no statistically significant differences in α-diversity indices among the three genus-dominant groups.
